# Supplementary material for: A Non-canonical Feedback Circuit for Rapid Interactions between Somatosensory Cortices
Source: PubMed Central journal article supplement (PMC6004823; doi:10.1016/j.celrep.2018.04.115), 2018-05-29
Supplement: NIHMS973281-supplement-1.pdf [file NIHMS973281-supplement-1.pdf]

**Cell Reports, Volume 23**

**Supplemental Information**

**A Non-canonical Feedback Circuit  
for Rapid Interactions  
between Somatosensory Cortices**

**Genki Minamisawa, Sung Eun Kwon, Maxime Chevée, Solange P. Brown, and Daniel H. O'Connor**

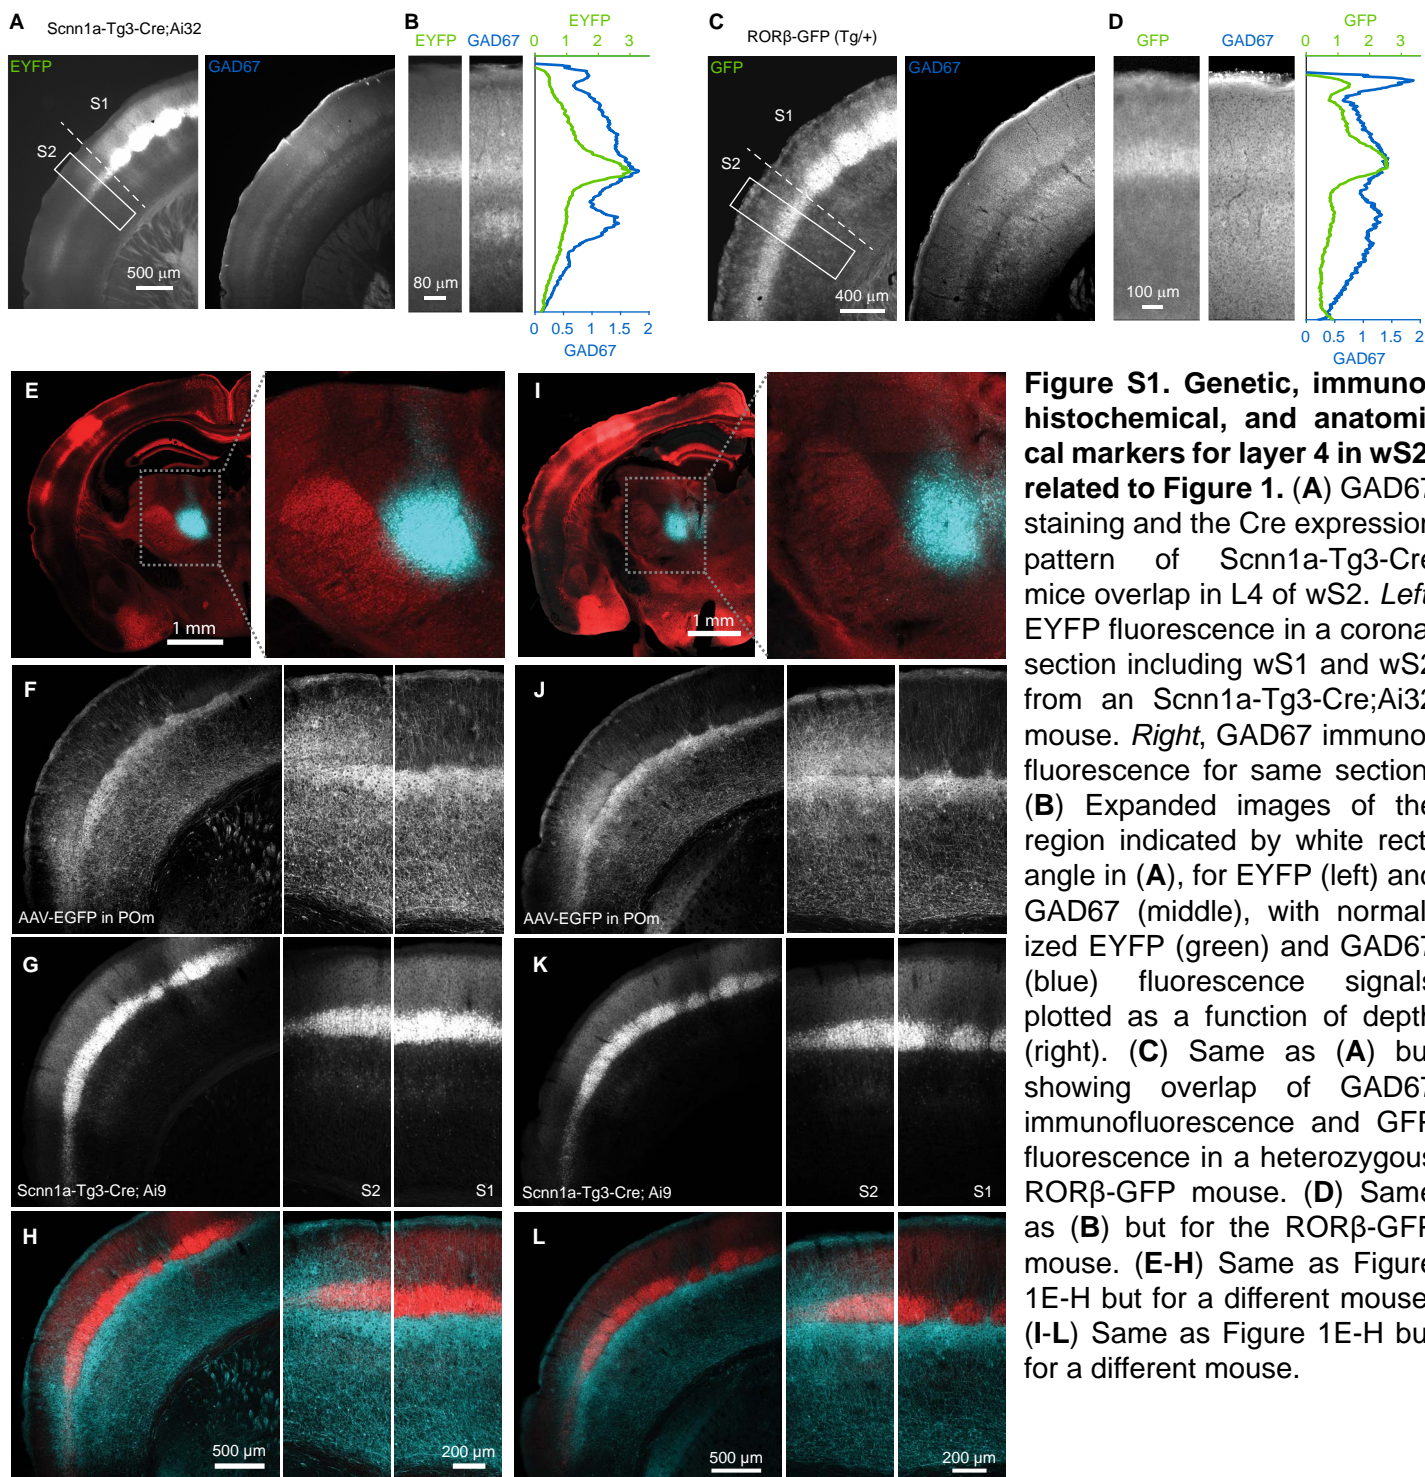

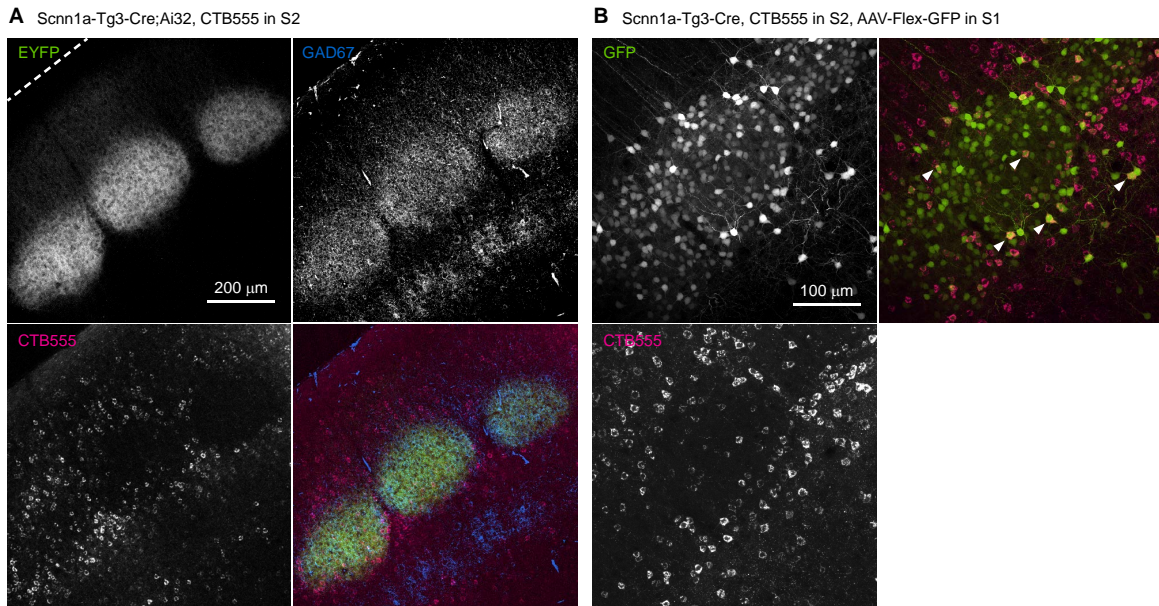

**Figure S2. S1→S2 neurons in the regions surrounding barrels, related to Figure 1. (A)** S1→S2 neurons are mostly outside of barrels. *Top left*, ChR2-EYFP fluorescence showing barrels in wS1 from an Scnn1a-Tg3-Cre;Ai32 mouse. *Top right*, GAD67 immunofluorescence for same field of view. *Bottom left*, S1→S2 neurons are retrogradely labeled with CTB-Alexa555, same field of view. *Bottom right*, Overlay of EYFP, GAD67 and CTB-Alexa555 images. **(B)** Similar to **(A)**, but with cytosolic GFP fluorescence instead of ChR2-EYFP. *Top left*, GFP fluorescence from wS1 of an Scnn1a-Tg3-Cre mouse injected with an AAV virus (AAV-Flex-GFP) that gives Cre-dependent expression of GFP. *Bottom left*, S1→S2 neurons are retrogradely labeled with CTB-Alexa555, same FOV. *Top right*, Overlay of GFP and CTB-Alexa555 images. Double labeled neurons (white arrowheads) occur but are relatively few. **(A-B)** Images are confocal stack z-projections.

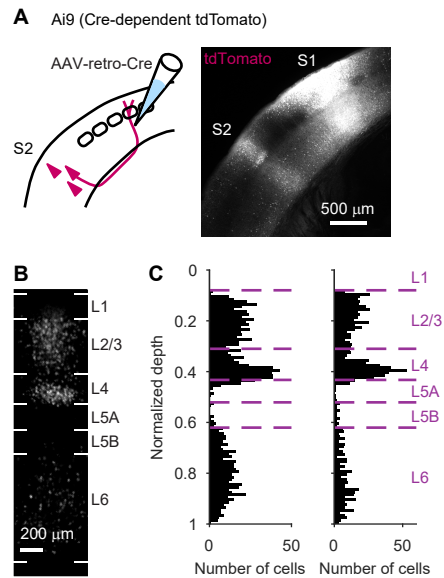

**Figure S3. S2→S1 neurons retrogradely labeled using rAAV2-retro, related to Figure 1. (A)** S2→S1 neurons are labeled with tdTomato following rAAV2-retro-Syn-Cre injection into wS1 of an Ai9 reporter mouse. **(B)** Example confocal image showing tdTomato-labeled neurons in wS2. **(C)** Number of retrogradely labeled S2→S1 neurons in wS2, plotted as a function of normalized depth for two individual mice (left and right panels, n = 1,266 and 1,056 neurons, respectively). Prominent retrograde labeling is evident in L4.

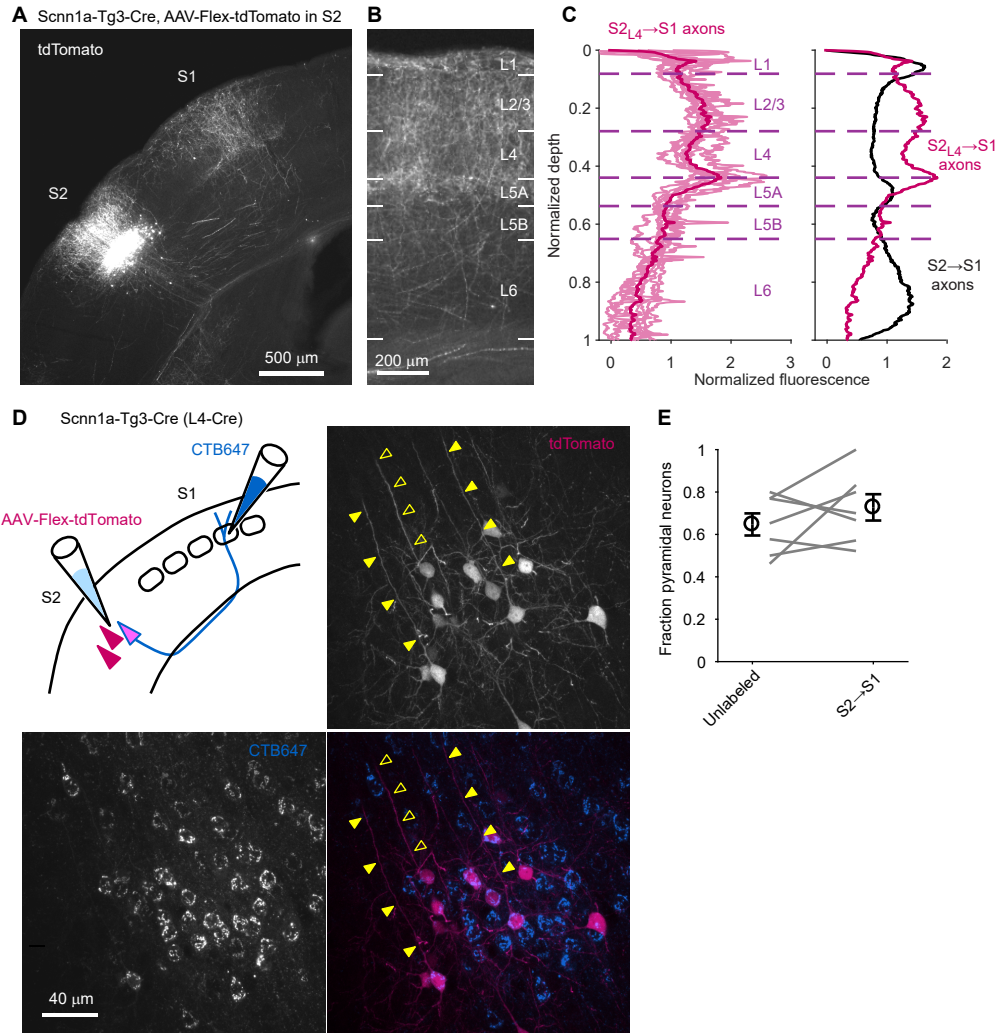

**Figure S4.  $S2_{L4} \rightarrow S1$  neurons largely project to superficial S1 and have pyramidal morphology, related to Figure 1.** (A) Example coronal section showing tdTomato fluorescence in an Scnn1a-Tg3-Cre mouse injected with a Cre-dependent tdTomato virus (AAV-Flex-tdTomato) into wS2. Fluorescence from wS2 L4 neurons expressing tdTomato is evident in superficial wS1. (B) Zoomed image of wS1. (C) *Left*, Normalized  $S2_{L4} \rightarrow S1$  axonal fluorescence measured in wS1, shown for individual mice (light magenta curves,  $n = 8$ ) and the mean (dark magenta). *Right*, Mean  $S2_{L4} \rightarrow S1$  data (magenta) replotted together with the mean from Figure 1D (black), to allow comparison of the  $S2_{L4} \rightarrow S1$  and total  $S2 \rightarrow S1$  projection patterns. (D) *Top left*, Schematic of experiment to examine the morphology of  $S2_{L4} \rightarrow S1$  neurons.  $S2 \rightarrow S1$  neurons were retrogradely labeled with CTB-Alexa647, and  $S2_{L4}$  neurons were sparsely labeled using injections of diluted Cre-dependent tdTomato AAV virus (AAV-Flex-tdTomato) in Scnn1a-Tg3-Cre mice. *Top right*, Example confocal image from wS2 showing putative apical dendrites of neurons co-labeled with CTB and tdTomato (closed arrowheads) and a tdTomato-labeled neuron not labeled by CTB (open arrowheads). *Bottom left*, Same field of view but showing CTB-Alexa647 signal only. *Bottom right*, Overlay of tdTomato and CTB-Alexa647 images. (E) Fraction of tdTomato-positive neurons in wS2 that had clear pyramidal morphology for individual mice (gray lines,  $n = 7$ ) and the means ( $\pm$  SEM;  $0.65 \pm 0.05\%$  and  $0.73 \pm 0.06\%$  for unlabeled and CTB-labeled neurons, respectively;  $p = 0.29$ , paired t-test)..

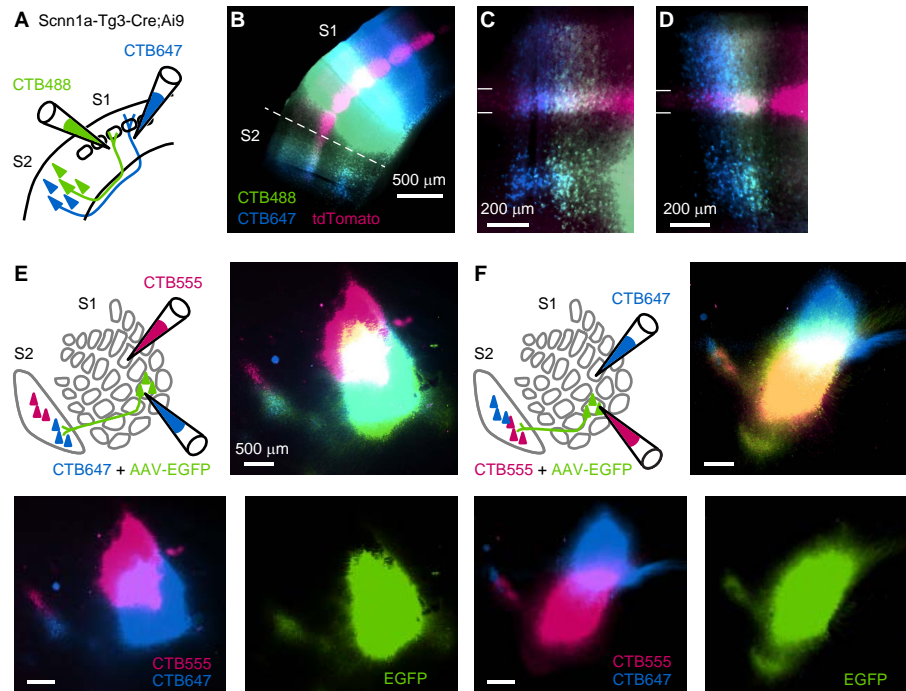

**Figure S5. Additional examples of dual CTB-Alexa injection results, related to Figure 2. (A)** Schematic of experiment. Two colors of CTB-Alexa were injected in different barrel columns of wS1 in a mouse (*Scnn1a-Tg3-Cre;Ai9*) expressing tdTomato in L4 neurons, to retrogradely label neurons in wS2. **(B)** Coronal section from experiment depicted in **(A)**, showing CTB-Alexa488 and CTB-Alexa647 fluorescence at neighboring injection sites in wS1, and locations of retrograde labeling in wS2. **(C)** Zoom of section from **(B)**, showing retrogradely labeled site in wS2. Neighboring patterns of CTB-Alexa488 and CTB-Alexa647 are evident, including among L4 neurons. L4 was determined by tdTomato fluorescence and is indicated by horizontal white lines. **(D)** Same as **(C)** but for a different mouse. **(E)** Same as Figure 2D but for a different mouse. **(F)** Same as Figure 2D but for a different mouse.

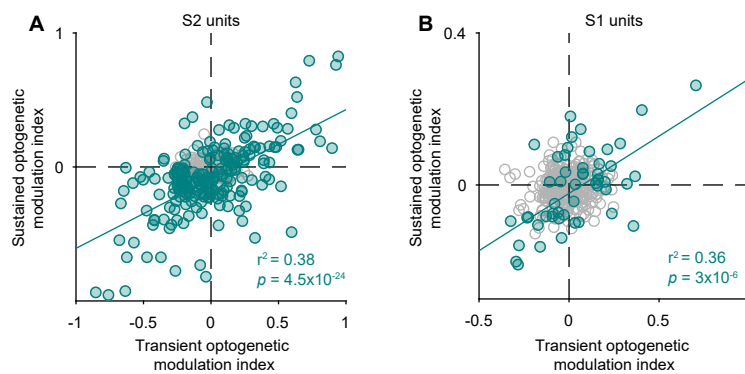

**Figure S6. Optogenetic modulation indices from transient and sustained portions of stimulus are correlated, related to Figure 5. (A)** Optogenetic modulation index calculated from transient and sustained phases of the stimulus for S2 units. The transient phase corresponds to the first 100 ms of LED illumination, from -200 ms to -100 ms relative to whisker stimulus onset. The sustained phase corresponds to an identical period as the 500 ms whisker stimulus. Units with optogenetic modulation index significantly different from 0 in either the transient or sustained phases are plotted in light green; other S2 units are plotted in gray. Linear regression line (light green) was fitted to the significant units ( $n = 212$  significant units out of 393 total, 14 recordings from 6 mice). **(B)** Same as **(A)** but for units from S1 ( $n = 50$  significant units out of 347 total, 16 recordings from 6 mice).

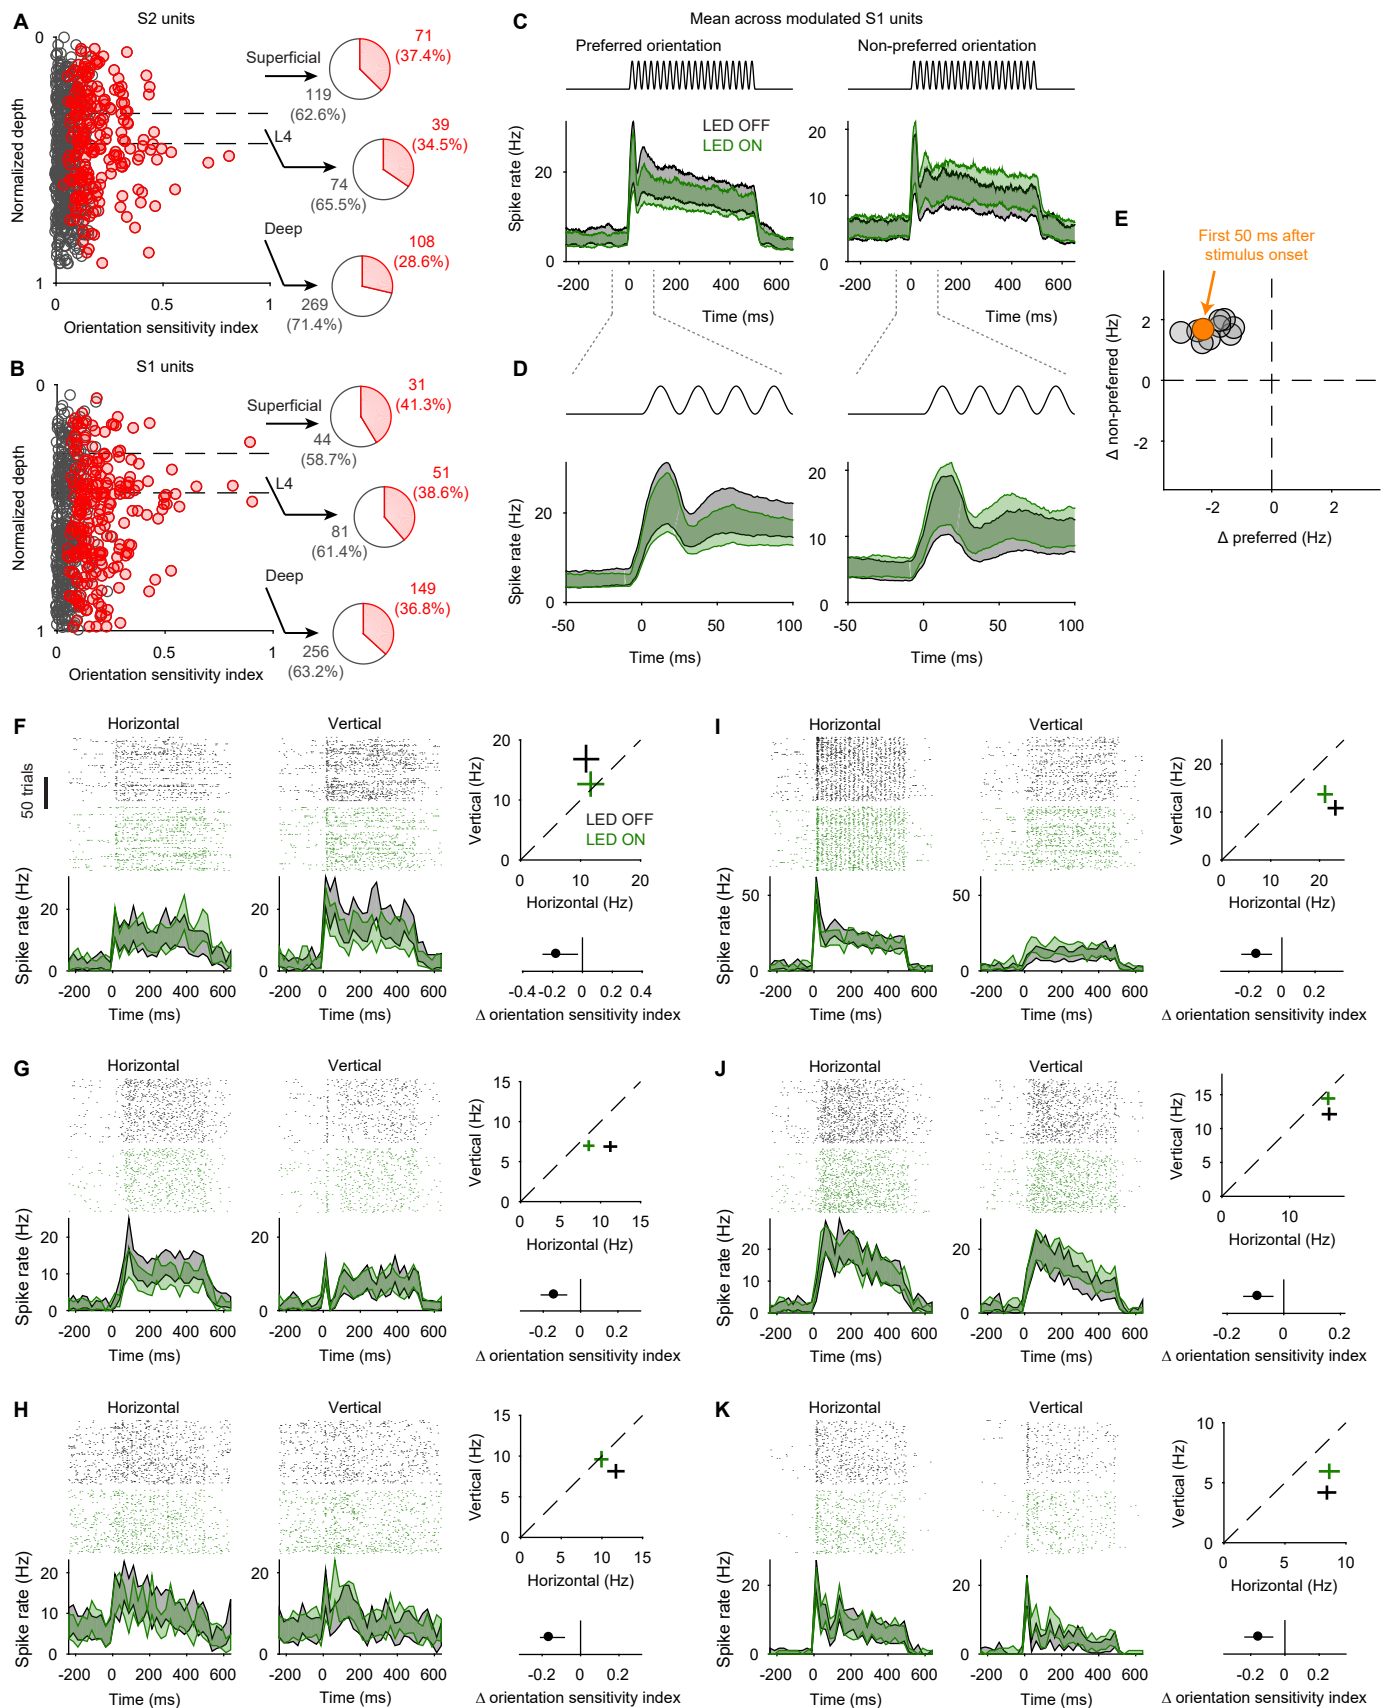

**Figure S7. OSI for all S2 and S1 units, time course of effect of S2<sub>L4</sub> inhibition on S1, and additional examples of S1 units with orientation sensitivity decreased by S2<sub>L4</sub> inhibition, related to Figure 7. (A) OSI for each whisker-responsive S2 unit plotted as a function of normalized depth within cortex. Units with significant orientation sensitivity are plotted in red. Boundaries of cortical layer 4 estimated by current source density analysis are indicated with horizontal dashed lines. (Continued)**



Pie charts show percentages of units with significant orientation sensitivity for L4 and layers above (“superficial”) and below (“deep”) L4. Units are pooled across ChR2 and eArch3.0 experiments ( $n = 612$  units, 27 recordings from 12 mice). **(B)** Same as **(A)** but for whisker-responsive S1 units ( $n = 680$  units, 30 recordings from 13 mice). **(C)** Mean PSTHs for wS1 units with a significant decrease in *OSI* during  $S2_{L4}$  inhibition ( $n = 34$ ; same units as depicted with blue shading in Figure 7J). Separate PSTHs are shown for responses to whisker deflections along the preferred (left) and non-preferred (right) orientations, and with (green) and without (black)  $S2_{L4}$  inhibition. **(D)** Same PSTHs as in **(C)**, but zoomed to show the first 100 ms after whisker stimulus onset. Effects of  $S2_{L4}$  inhibition are evident in this early window. **(E)** Change in mean spike rate during optogenetic inhibition of  $S2_{L4}$  for preferred and non-preferred whisker deflection orientations, shown as the mean across wS1 units ( $n = 34$ ; same as in **(C)**) in consecutive 50 ms time bins beginning at stimulus onset. The first time bin (0 to 50 ms after stimulus onset) is indicated in orange. The effect of  $S2_{L4}$  inhibition occurs in all time bins. **(F)** Example S1 unit showing reduction in response to preferred (vertical) orientation during  $S2_{L4}$  inhibition. **(G)** Example S1 unit showing reduction in response to preferred (horizontal) orientation during  $S2_{L4}$  inhibition. **(H)** Example S1 unit showing reduction in response to preferred (horizontal) orientation during  $S2_{L4}$  inhibition. **(I)** Example S1 unit showing increase in response to non-preferred (vertical) orientation during  $S2_{L4}$  inhibition. **(J)** Example S1 unit showing increase in response to non-preferred (vertical) orientation during  $S2_{L4}$  inhibition. **(K)** Example S1 unit showing increase in response to non-preferred (vertical) orientation during  $S2_{L4}$  inhibition. **(F-K)** Conventions as in Figure 7F,G.
